# Supplementary material for: Intercomparison of biogenic CO 2 flux models in four urban parks in the city of Zurich
Source: Copernicus journal article supplement (doi:10.5194/egusphere-2024-2475), 2024-09-04
Supplement: Supplementary file [file egusphere-2024-2475-AC1-supplement.zip]

**Table 1. Main characteristics of the parks used as study areas. The surface cover statistics are based on the land cover product (Section 2.4) and the tree information comes from the city tree inventory (Baumkataster Zurich, 2024).**

|                             | Bullingerhof        | Hardaupark          | Fritschiwiese    | Heiligfeld |
|-----------------------------|---------------------|---------------------|------------------|------------|
| Surface cover fractions (%) |                     |                     |                  |            |
| Trees                       | 54                  | 29                  | 38               | 41         |
| Grass                       | 39                  | 53                  | 51               | 52         |
| Paved                       | 7                   | 18                  | 11               | 7          |
| Main tree species           | <i>Platanus</i> sp. | <i>Platanus</i> sp. | <i>Tilia</i> sp. | diverse    |
| Mean tree height (m)        | 29                  | 14                  | 16               | 20         |
| Park age (years)            | 94                  | 14                  | 74               | 59         |

**Table 2: Overview of data inputs required by each model during the simulation period 01/2022–09/2023.**

| Input                                     | Time-step, aggregation       | Location                   | diFUME | JSBACH | SUEWS | VPRM |
|-------------------------------------------|------------------------------|----------------------------|--------|--------|-------|------|
| Air temperature ( $T_{\text{air}}$ ), 2 m | Hourly, average              | Kaserne                    | X      | X      | X     | X    |
| Global radiation                          | Hourly, average              | Kaserne                    | X      | X      | X     | X    |
| Downward longwave radiation               | Hourly, average              | Hardau, ERA-5              |        | X      |       |      |
| Relative humidity, 2 m                    | Hourly, average              | Kaserne                    | X      | X      | X     |      |
| Wind speed, 35 m                          | Hourly, average              | Kaserne                    |        | X      | X     |      |
| Air pressure, 2 m                         | Hourly, average              | Kaserne                    |        |        | X     |      |
| Precipitation                             | Hourly, total                | Kaserne                    |        | X      | X     |      |
| Atmospheric CO <sub>2</sub> concentration | Monthly, average             | Hardau, Beromunster, ERA-5 |        | X      |       |      |
| Soil temperature ( $T_{\text{soil}}$ )    | Hourly, average              | Parks                      | X      |        |       |      |
| Soil water content (SWC)                  | Hourly, average              | Parks                      | X      |        |       |      |
| Land cover map                            | Static                       | City                       | X      |        | X     | X    |
| DSM                                       | Static                       | City                       | X      |        | X     |      |
| Satellite LAI                             | Daily, linear interpolation  | City                       | X      |        |       |      |
|                                           | Daily, linear interpolation, |                            |        |        |       |      |
| Satellite EVI, LSWI                       | Savitzky-Golay filter        | City                       |        |        |       | X    |

**Table 3. Monthly average fluxes ( $\mu\text{mol CO}_2 \text{ m}^{-2} \text{ s}^{-1}$ ) of the city central 2 km x 2 km domain (Fig. 1), considering the total anthropogenic emissions (building heating, industry, vehicle traffic, human respiration) and the biogenic CO<sub>2</sub> flux components (GPP, R<sub>eco</sub>, NEE) and uncertainties (unc., Section 3.3). The percentages (%) to the total monthly CO<sub>2</sub> balances are given in parentheses. The data are monthly averages of the years 2022 and 2023.**

|     | Total  |     |        |     |          |     |                  |     |                       |      |         |     |          |  |
|-----|--------|-----|--------|-----|----------|-----|------------------|-----|-----------------------|------|---------|-----|----------|--|
|     | anthr. | GPP |        |     | GPP unc. |     | R <sub>eco</sub> |     | R <sub>eco</sub> unc. |      | NEE     |     | NEE unc. |  |
| Jan | 29.1   | 0.1 | (0.4)  | 0.1 | (0.3)    | 0.6 | (1.9)            | 0.2 | (0.6)                 | 0.4  | (1.5)   | 0.2 | (0.6)    |  |
| Feb | 27.0   | 0.3 | (1.1)  | 0.2 | (0.6)    | 0.6 | (2.2)            | 0.2 | (0.6)                 | 0.3  | (1.1)   | 0.2 | (0.8)    |  |
| Mar | 21.5   | 0.9 | (4.0)  | 0.5 | (2.2)    | 0.9 | (4.0)            | 0.3 | (1.2)                 | 0.0  | (0.0)   | 0.5 | (2.2)    |  |
| Apr | 18.4   | 1.8 | (9.9)  | 0.8 | (4.4)    | 1.2 | (6.9)            | 0.3 | (1.6)                 | -0.5 | (-3.1)  | 0.8 | (4.2)    |  |
| May | 9.3    | 2.9 | (34.2) | 0.9 | (10.2)   | 2.0 | (23.3)           | 0.4 | (4.5)                 | -0.9 | (-10.8) | 0.8 | (9.5)    |  |
| Jun | 8.7    | 2.9 | (36.0) | 0.8 | (9.4)    | 2.4 | (29.9)           | 0.3 | (4.3)                 | -0.5 | (-6.1)  | 0.8 | (10.2)   |  |
| Jul | 8.7    | 2.5 | (28.6) | 0.7 | (8.2)    | 2.6 | (30.1)           | 0.3 | (3.7)                 | 0.1  | (1.6)   | 0.8 | (9.2)    |  |
| Aug | 8.7    | 1.9 | (20.7) | 0.6 | (7.0)    | 2.5 | (27.1)           | 0.4 | (4.1)                 | 0.6  | (6.4)   | 0.7 | (7.8)    |  |
| Sep | 9.6    | 1.9 | (19.6) | 0.5 | (5.3)    | 2.1 | (21.6)           | 0.4 | (4.5)                 | 0.2  | (2.1)   | 0.6 | (6.1)    |  |
| Oct | 10.2   | 1.2 | (11.2) | 0.4 | (3.9)    | 1.6 | (15.5)           | 0.1 | (1.3)                 | 0.5  | (4.3)   | 0.4 | (3.9)    |  |
| Nov | 23.0   | 0.5 | (2.2)  | 0.2 | (1.0)    | 1.1 | (4.5)            | 0.2 | (0.8)                 | 0.5  | (2.3)   | 0.3 | (1.2)    |  |
| Dec | 29.0   | 0.1 | (0.4)  | 0.1 | (0.3)    | 0.6 | (2.1)            | 0.2 | (0.6)                 | 0.5  | (1.7)   | 0.2 | (0.6)    |  |
